# Supplementary material
Source: publisher figshare collection journal article supplement (https://acs.figshare.com/ndownloader/files/14954720)
Supplement: Supplementary file 1 [file 14954720]

# Six-membered Janus-type ditopic N-heterocyclic carbene coinage metal complexes

Zejun Hu,<sup>‡a</sup> Xufeng Ma,<sup>‡a</sup> Jiwei Wang,<sup>a</sup> Han Wang,<sup>a</sup> Xiaoyan Han,<sup>b</sup> Min Shi,<sup>a,c</sup> and Jun Zhang<sup>\*a</sup>

<sup>a</sup>Key Laboratory for Advanced Materials and Institute of Fine Chemicals, School of Chemistry & Molecular Engineering, East China University of Science and Technology, 130 Mei Long Road, Shanghai 200237, China.

<sup>b</sup>Testing and Analysis Center, Soochow University, Suzhou 215123, China

<sup>c</sup>State Key Laboratory of Organometallic Chemistry, Shanghai Institute of Organic Chemistry, Chinese Academy of Sciences, 354 Fenglin Road, Shanghai 200032, China.

<sup>‡</sup>These authors contributed equally.

## 1. NMR Spectra:

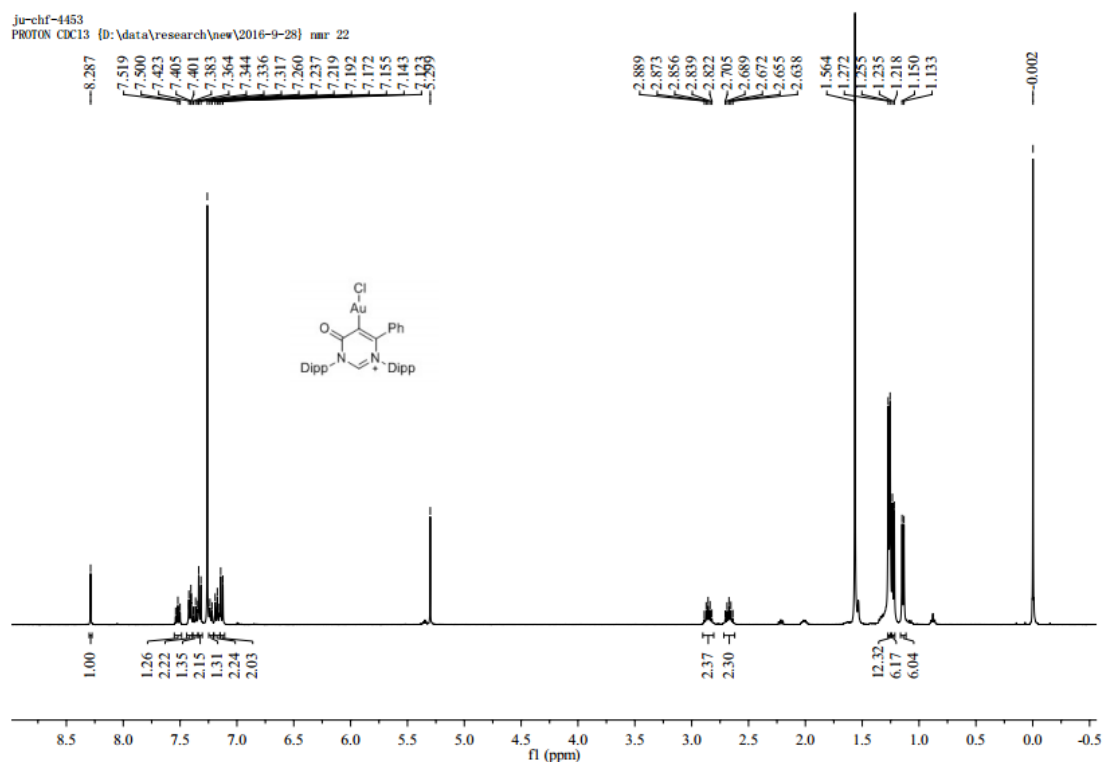

Figure S1.  $^1\text{H}$  NMR spectrum of **2**

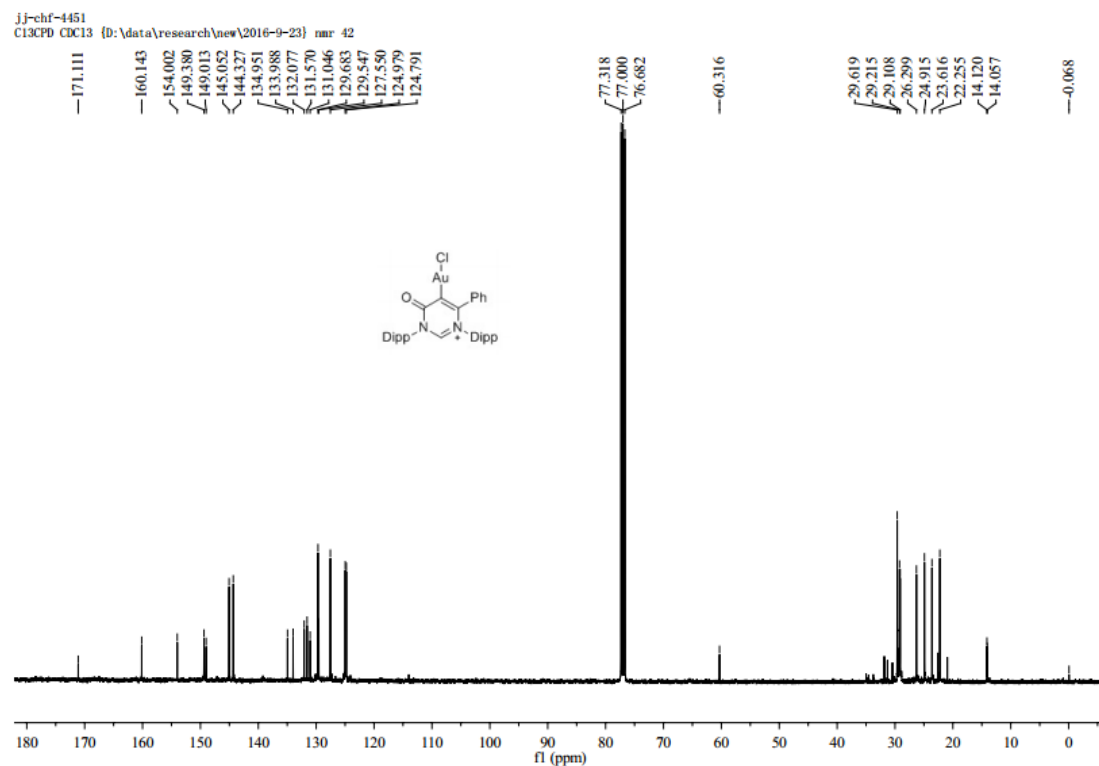

Figure S2.  $^{13}\text{C}\{^1\text{H}\}$  NMR spectrum of **2**



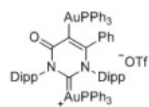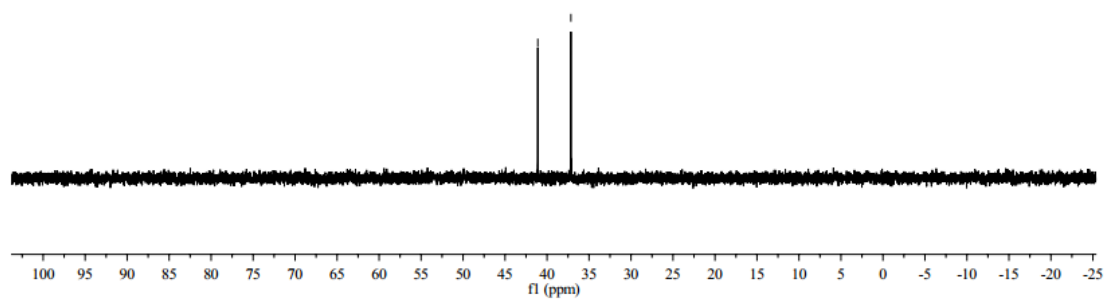

**Figure S5.**  $^{31}\text{P}$  NMR spectrum of **3**

Y30140194-0923-6374

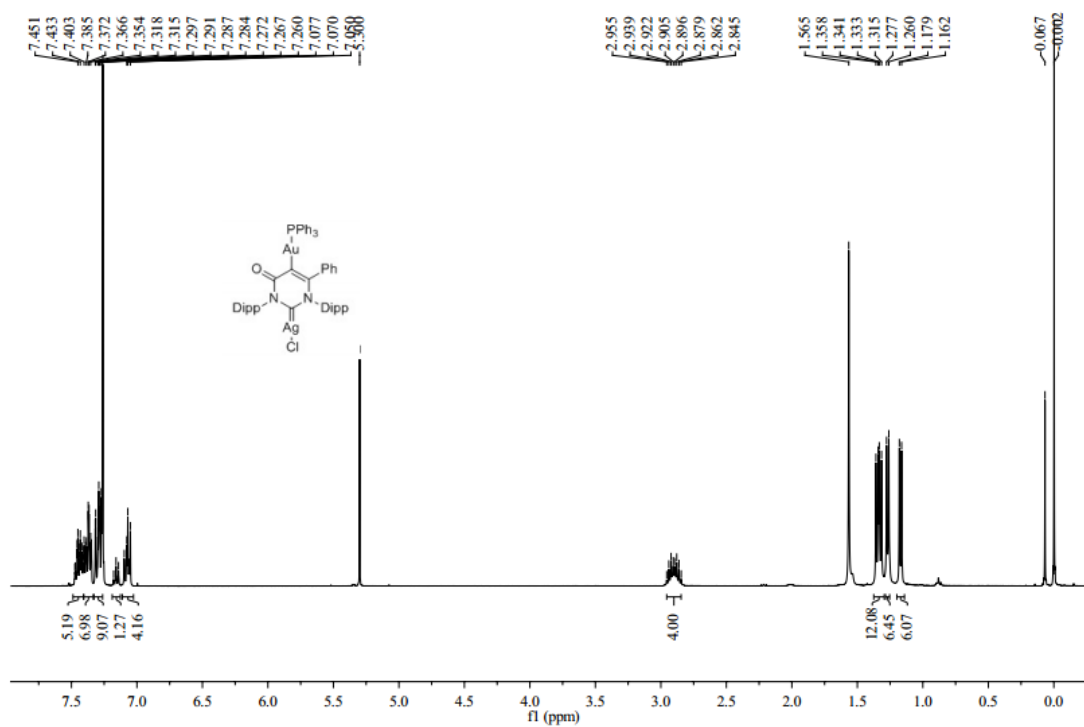

Figure S6. <sup>1</sup>H NMR spectrum of **4**

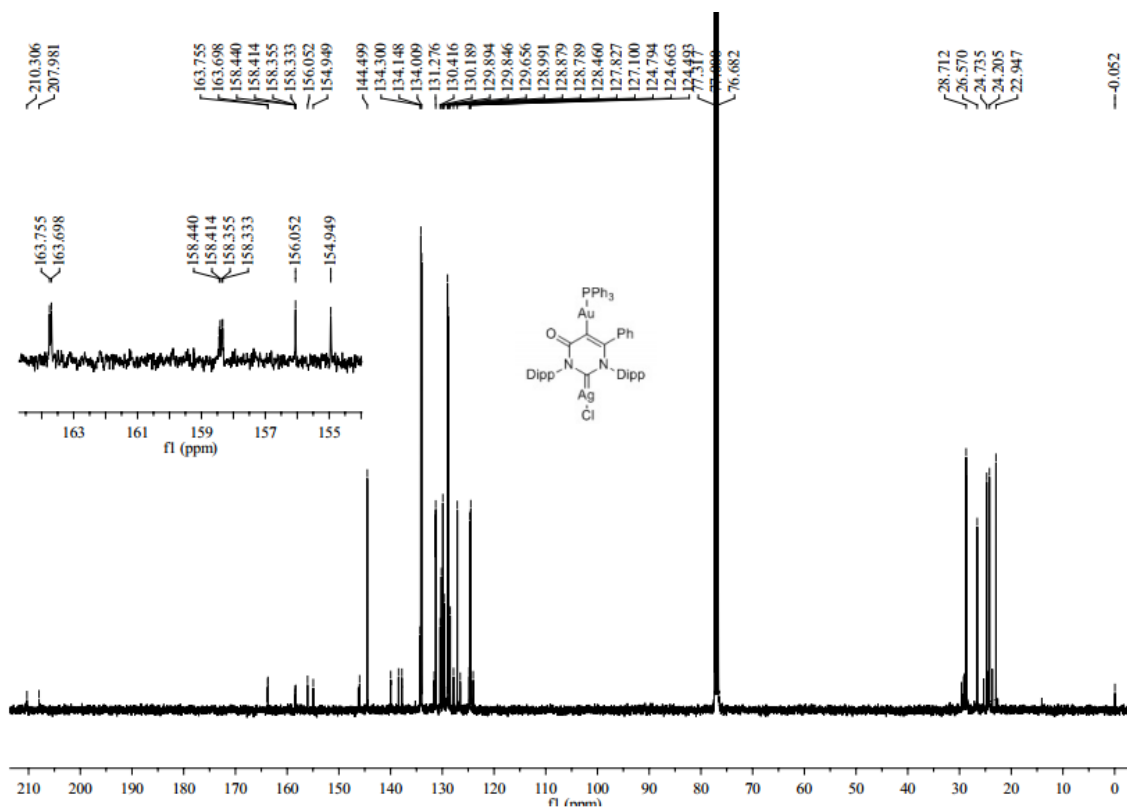

Figure S7. <sup>13</sup>C{<sup>1</sup>H} NMR spectrum of **4**

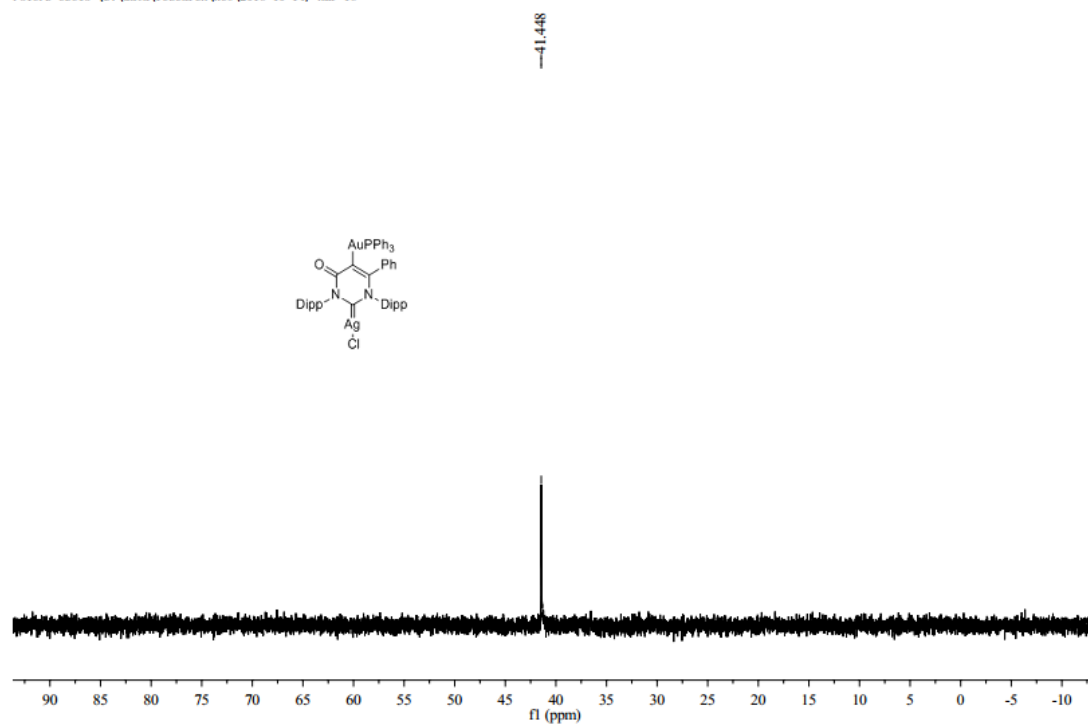

**Figure S8.**  $^{31}\text{P}$  NMR spectrum of **4**

## 2. X-Ray Crystallography.

Each crystal was mounted on a glass fiber. Crystallographic measurements were made on a Bruker Smart Apex 100 CCD area detector using graphite monochromated Mo-K $\alpha$  radiation ( $\lambda_{\text{Mo-K}\alpha} = 0.71073 \text{ \AA}$ ). The structures were solved by direct methods (SHELXS-97) and refined on  $F^2$  by full-matrix least squares (SHELX-97) using all unique data. All the calculations were carried out with the SHELXTL18 program.

Key details of the crystal and structure refinement data are summarized in Table S1. Further crystallographic details may be found in the respective CIF files, which were deposited at the Cambridge Crystallographic Data Centre, Cambridge, UK [1514557 (**3**), 1514558 (**4**)].

**Table S1.** Crystal Data, Data Collection, and Structure Refinement for **3** and **4**.

|                                                             | <b>3</b>                                                                                                         | <b>4</b>                                                       |
|-------------------------------------------------------------|------------------------------------------------------------------------------------------------------------------|----------------------------------------------------------------|
| Identification code                                         | mo_60927a                                                                                                        | mo_dm16636_0m                                                  |
| CCDC                                                        | 1514557                                                                                                          | 1514558                                                        |
| Formula                                                     | C <sub>71</sub> H <sub>69</sub> Au <sub>2</sub> F <sub>3</sub><br>N <sub>2</sub> O <sub>4</sub> P <sub>2</sub> S | C <sub>52</sub> H <sub>54</sub> Ag Au Cl<br>N <sub>2</sub> O P |
| Formula weight                                              | 1559.21                                                                                                          | 1094.23                                                        |
| <i>T</i> , K                                                | 296(2)                                                                                                           | 296                                                            |
| crystal system                                              | Monoclinic                                                                                                       | Monoclinic                                                     |
| space group                                                 | P2 <sub>1</sub> /n                                                                                               | P 1 21/n 1                                                     |
| <i>a</i> , Å                                                | 11.428(5) Å                                                                                                      | 12.8674(13)                                                    |
| <i>b</i> , Å                                                | 18.633(8)                                                                                                        | 16.5479(16)                                                    |
| <i>c</i> , Å                                                | 30.513(14)                                                                                                       | 25.510(3)                                                      |
| , deg                                                       | 90                                                                                                               | 90                                                             |
| , deg                                                       | 91.687(9)                                                                                                        | 103.277(2)                                                     |
| , deg                                                       | 90                                                                                                               | 90                                                             |
| Volume, Å <sup>3</sup>                                      | 6495(5)                                                                                                          | 5286.7(9)                                                      |
| <i>Z</i>                                                    | 4                                                                                                                | 4                                                              |
| <i>D</i> <sub>calc</sub> , Mg / m <sup>3</sup>              | 1.595                                                                                                            | 1.375                                                          |
| absorption<br>coefficient, mm <sup>-1</sup>                 | 4.652                                                                                                            | 3.257                                                          |
| F(000)                                                      | 3088                                                                                                             | 2184                                                           |
| crystal size, mm                                            | 0.420 x 0.150 x<br>0.110                                                                                         | ? x ? x ?                                                      |
| 2θ range, deg                                               | 1.726 to 26.999                                                                                                  | 1.640 to 27.664                                                |
| reflections<br>collected /unique                            | 45401/14139<br>[R(int) = 0.1036]                                                                                 | 44065/12263<br>[R(int) = 0.0438]                               |
| data / restraints/<br>parameters                            | 14139 / 56 / 774                                                                                                 | 12263 / 0 /<br>540                                             |
| goodness of<br>fit on F <sup>2</sup>                        | 0.930                                                                                                            | 1.014                                                          |
| final R indices<br>[ <i>I</i> > 2( <i>I</i> )] <sup>a</sup> | R1 = 0.0513,<br>wR2 = 0.1147                                                                                     | R1 = 0.0345,<br>wR2 = 0.0697                                   |
| R indices<br>(all data)                                     | R1 = 0.1165,<br>wR2 = 0.1437                                                                                     | R1 = 0.0647,<br>wR2 = 0.0795                                   |
| lgst diff peak<br>and hole, e/Å <sup>3</sup>                | 0.979 and -0.804                                                                                                 | 0.790 and -1.152                                               |
